# Supplementary material for: Gene expression profiling describes the genetic regulation of Meloidogyne arenaria resistance in Arachis hypogaea and reveals a candidate gene for resistance
Source: PubMed Central journal article supplement (PMC5430994; doi:10.1038/s41598-017-00971-6), 2017-05-02
Supplement: 41598_2017_971_MOESM2_ESM.pdf [file 41598_2017_971_MOESM2_ESM.pdf]

##Scripts readme

##First filter vcf files of species of interest against reference of interest and genotype of interest with as many control genotypes as available using FilterIntro.py.

##Second run MapIntro.py to select those SNPs that are diagnostic in the species of interest and are unique in the genotype of interest relative to the control genotypes
